# Supplementary material for: Excitement and Concerns of Young Radiation Oncologists over Automatic Segmentation: A French Perspective
Source: MDPI journal article supplement (doi:10.3390/cancers15072040), 2023-03-29
Supplement: s1 [file s1]

## **SUPPLEMENTARY MATERIALS**

**Supplementary Protocol S1:** Form in French with the corresponding English Translation

**Supplementary Table S1:** Checklist for Reporting Results of Internet E-Surveys (CHERRIES)

**Supplementary Figure S1:** Number of new patients per year on a participant-by-participant analysis

**Supplementary Figure S2:** Access to automatic segmentation solutions on a participant-by-participant analysis

**Supplementary Figure S3:** Ranking of OARs based on their importance – Brain localization

**Supplementary Figure S4:** Ranking of OARs based on their importance – Head and neck localization

**Supplementary Figure S5:** Ranking of OARs based on their importance – Thorax localization

**Supplementary Figure S6:** Ranking of OARs based on their importance – Abdomen localization

**Supplementary Figure S7:** Ranking of OARs based on their importance – Pelvis localization

**Supplementary Figure S8:** Limitations of automatic segmentation softwares regarding target volumes segmentation

**Supplementary Protocol S1:** Form (original in French, translated into English for publication)

1. Je souhaite m'inscrire au webinaire de Dosimétrie ORL/I would like to register to the H&N dosimetry webinar
  - Oui/Yes
  - Non/No
2. Préciser votre nom et prénom/State your name and surname
3. Préciser votre adresse mail/state your mail adress
4. Préciser votre centre de formation/State your academic center
5. Préciser votre statut/State your status
  - Interne/Resident
  - Chef de clinique ou Assistant/Attending
  - Titulaire/Senior physician
  - FFI/Foreign Intern
  - Elève/Student
  - En disponibilité/No position
- 5.1 Si Interne/If Resident
  - a. Quelle est votre ancienneté ?/State your year of training
    - 1<sup>ère</sup> année/1st year
    - 2<sup>ème</sup> année/2<sup>nd</sup> year
    - 3<sup>ème</sup> année/3rd year
    - 4<sup>ème</sup> année/4th year
    - 5<sup>ème</sup> année/5th year
- 5.2 Si Chef de clinique ou Assistant/If Attending
  - a. Quelle est votre ancienneté ?/state your year of training
    - < 2 ans/< 2 years
    - > 2 ans/> 2 years
- 5.3 Si titulaire/If senior physician
  - a. Quelle est votre ancienneté ?/State your year of training
    - 2-5 ans/2-5 years
    - 5-10 ans/5-10 years
    - 10-20 ans/10-20 years
    - > 20 ans/> 20 years
6. Dans quelle structure travaillez-vous ?/ In what type of structure do you work ?
  - CHU/University hospital
  - CLCC/Academic center specializing in cancer care
  - CHG/General hospital
  - Clinique privée/Private clinic
7. Quel est le nombre de patients traités par an dans votre service ?/ How many patients per year are treated in your department ?
  - < 800

- 800-1000
  - 1000-1500
  - 1500-2000
  - > 2000
8. Dans votre centre, par qui sont contoutés les organes à risque (OARs) ?/In your centre, who performs the delination of organs at risks (OARs) ?
- Dosimétristes et physiciens/Dosimetrists and physicists
  - Internes le plus souvent/Mostly residents
  - Médecins seniors le plus souvent/Attending or senior physicians mostly
  - Internes, médecins séniors, physiciens et dosimétristes/Attending, senior physicians, attendings, physicists and dosimetrists
9. Votre service est-il équipé d'une solution de contourage automatique ?/Is your centre equipped with an automatic delination solution ?
- Oui/Yes
  - Non/No
- 9.1 Si votre service dispose d'une solution de contourage automatique/If your department is equipped with an automatic delineation solution :
- a. Depuis combien de temps les outils d'intelligence artificielle pour la délinéation ont été intégrés en routine clinique ?/ How long have artificial intelligence tools for delineation been integrated into clinical routine?
- o < 1an/< 1 year
  - o 1-2 ans/1-2 years
  - o > 2 ans/> 2 years
- b. Qui a accès à ces outils dans votre centre ?/ Who has access to these tools in your centre?
- o Tous les radiothérapeutes quelque soit leur niveau d'expérience/All RadOncs whatever their level of experience
  - o Médecins seniors uniquement/Senior physicians only
  - o Dosimétristes et physiciens uniquement/Dosimetrists and physicists only
  - o Internes, médecins séniors, physiciens et dosimétristes/Attending, senior physicians, attendings, physicists and dosimetrists
- c. Quelle/Quelles est/sont le ou les noms de la solution disponible dans votre service ?/ What is/are the name(s) of the solution available in your department?
- o ART-plan Annotate (Therapanacea)
  - o DLCExpert
  - o RayStation automatic segmentation
  - o Mirada Workflow-Box
  - o Elekta ABAS
  - o SPICE
  - o MIM Maestro
  - o Mvision AI
  - o Limbus AI
  - o Syngo via (Siemens)

- Non connu/Not known
- d. Quelles ont été les motivations de votre centre pour intégrer ces outils ?/ What were the motivations for your centre to integrate these tools?
  - Gagner du temps/Time saving
  - Budget disponible/Available budget
  - Améliorer la qualité des plans de traitement/Improve quality of treatment
  - Diminuer la variabilité des contours entre médecins/Reduce inter-physician variability in contouring
  - Tendre vers les recommandations internationales/ Move towards the international recommendations
- e. Pour quelles localisations utilisez-vous ces outils ?/ For which locations do you use these tools?
  - Sein/Breast
  - Prostate/Prostate
  - Pelvis/Pelvis
  - ORL/Head and Neck
  - Thorax/Thorax
  - Neurologie/Neurology
  - Abdomen/Abdomen
  - Métastases/Metastasis
  - Toutes localisations/All localizations
- f. Classer les localisations suivantes par ordre croissant de temps gagné (1: peu de temps gagné -> 8: maximum de temps gagné)/ Rank the following locations in ascending order of time saved (1: little time saved -> 8: maximum time saved)
  - Sein/Breast
  - Prostate/Prostate
  - Pelvis/Pelvis
  - ORL/Head and Neck
  - Thorax/Thorax
  - Neurologie/Neurology
  - Abdomen/Abdomen
  - Métastases/Metastasis
- g. L'utilisation de ces logiciels vous permet-elle de gagner du temps pour contourer/Using this software saves you time in delineating :
  - Les volumes tumoraux macroscopiques/Macroscopic Tumour volumes (GTV T)
  - Les volumes cibles tumoraux/Tumour target volumes (CTV T)
  - Les volumes ganglionnaires macroscopiques/Macroscopic lymph nodes volumes (GTV N)
  - Les volumes ganglionnaires prophylactiques/Prophylactic lymph nodes volumes (CTV N)
  - Les organes à risque/Organs at risk

- h. Combien de temps estimez vous gagner pour le contourage des OARs (correction comprise) ?/How much time do you expect to save on OARs delineation (including correction) ?
  - ☐ 0%
  - ☐ < 25%
  - ☐ 25-50%
  - ☐ 50-75%
  - ☐ 75-100%
- i. En moyenne, quel pourcentage des contours devez-vous corriger ?/ On average, what percentage of the contours should you correct?
  - ☐ 0%
  - ☐ < 25%
  - ☐ 25-50%
  - ☐ 50-75%
  - ☐ 75-100%
- j. Avez vous déjà rencontré une erreur lors des contourages automatiques ?/ Have you ever encountered an error during automatic contouring?
  - ☐ Oui, erreur de la latéralité/Yes, laterality error
  - ☐ Oui, contours aberrants (mauvaise localisation)/Yes, aberrant contours (wrong location)
  - ☐ Oui mais uniquement des erreurs minimales et facilement corrigibles/Yes, but only minor and easily correctable errors
  - ☐ Non, jamais/No, never

9.2 Si votre service ne dispose pas d'une solution de contourage automatique/If your department isn't equipped with an automatic delineation solution :

- a. Quels sont les freins à l'adoption d'une telle solution ?/What are the obstacles to the adoption of such a solution?
  - ☐ Réponse libre/Free answer
- b. Avez-vous déjà testé/utilisé un logiciel de contourage automatique ?/Have you ever tested/used automatic contouring software?
  - ☐ Oui/Yes
  - ☐ Non/No
- c. Dans combien de temps pensez-vous que des outils d'intelligence artificielle pour la délimitation seront intégrés dans votre centre ?/How soon do you expect artificial intelligence tools for delineation to be integrated into your centre?
  - ☐ Jamais/Never
  - ☐ < 1 an/< 1 year
  - ☐ 1-2 ans/1-2 years
  - ☐ > 2 ans/> 2 years

10. Concernant, la définition des organes à risque/Regarding the delineation of organs at risk :

10.1 - Cerveau: Parmi la liste suivante, quels sont les 3 organes à risque à absolument intégrer à un logiciel ?/Brain: From the following list, what are the 3 organs at risk that must be included in software?

- Cerveau/Brain

- Tronc cérébral/Brainstem
- Cristallin/Lens
- Nef optique/Optic nerve
- Œil/Eye
- Chiasma optique/Optic chiasma
- Hippocampe/Hippocampus
- Cochlée/Inner ear
- Hypophyse/Pituitary gland
- Hypothalamus/Hypothalamus
- Glande lacrymale/Lacrymal gland

10.2 - ORL: Parmi la liste suivante, quels sont les 3 organes à risque à absolument intégrer à un logiciel ?/H&N: From the following list, what are the 3 organs at risk that must be included in software?

- Articulation temporo-mandibulaire/Temporo-mandibular articulation
- Mandibule/Mandible
- Cavité buccale/Oral cavity
- Parotide/Parotid
- Larynx/Larynx
- Muscles pharyngés/Pharyngeal muscles
- Œsophage/Esophagus
- Trachée/Trachea
- Moelle épinière/Spinal cord
- Thyroïde/Thyroid
- Vaisseaux/Vessels

10.3 - Thorax: Parmi la liste suivante, quels sont les 3 organes à risque à absolument intégrer à un logiciel ?/Thorax: From the following list, what are the 3 organs at risk that must be included in software?

- Poumons/Lungs
- Cœur/Heart
- Moelle épinière/Spinal cord
- Œsophage/Esophagus
- Thyroïde/Thyroid
- Sous-structures cardiaques/Cardiac sub-structures
- Vaisseaux/Vessels

10.4 - Abdomen: Parmi la liste suivante, quels sont les 3 organes à risque à absolument intégrer à un logiciel ?/Abdomen: From the following list, what are the 3 organs at risk that must be included in software?

- Moelle épinière/Spinal cord
- Foie/Liver
- Pancréas/Pancreas
- Rate/Spleen
- Cavité péritonéale/Bowel bag

- Grêle/Small bowel
- Colon/Large bowel
- Reins/Kidneys
- Vaisseaux/Vessels

10.5 - Pelvis: Parmi la liste suivante, quels sont les 3 organes à risque à absolument intégrer à un logiciel ?/Pelvis: From the following list, what are the 3 organs at risk that must be included in software?

- Vessie/Bladder
- Rectum/Rectum
- Sigmoïde/Sigmoid
- Canal anal/Anal canal
- Grêle/Small bowel
- Colon/Large bowel
- Prostate-Vésicules séminales ou vagin-utérus/Prostate-Seminal vesicles o vagina-uterus
- Vertèbres lombo-sacrées-Ailes iliaques/Lombosacral vertebrae-Iliac bones
- Vaisseaux/Vessels

10.6 Quel(s) OAR(s) vous paraissant intéressant n'avez-vous jamais vu dans un logiciel de segmentation automatique ?/ Which interesting OAR(s) have you never seen in automatic segmentation software?

- Réponse libre/Free answer

11. Concernant, la définition des volumes cibles/Regarding the delineation of target volumes

11.1 Le logiciel à votre disposition propose-t-il la segmentation automatique des volumes cibles ?/Does the software at your disposal offer automatic segmentation of target volumes?

- Oui/Yes
- Non/No

11.2 Si votre logiciel permet la définition des volumes cibles/If your software allows the definition of target volumes :

a. Quels volumes cibles sont proposés ?/What target volumes are proposed?

- o Volume tumoral/Tumour target volume
- o Volume ganglionnaire macroscopique/Nodal target volume
- o Volume ganglionnaire prophylactique/Prophylactic nodal volume

b. Combien de temps estimez-vous gagner pour le contourage des volumes cibles (correction comprise) ?/How much time do you expect to save in contouring the target volumes (including correction)?

- o 0%
- o < 25%
- o 25-50%
- o 50-75%
- o 75-100%

- c. Quelles sont les limites des logiciels de segmentation ?/ What are the limitations of segmentation software?
- Rapidité/Speed
  - Précision/Accuracy
  - Cout/Cost
  - Manque d'intégration inter-logiciel/Lack of cross software integration
  - Manque d'exhaustivité des structures proposées/Lack of completeness of proposed structures
  - Nécessité de correction/Need for editing
  - Perte d apprentissage/Learning loss
  - Autre/Other :
12. Pensez-vous que l'utilisation de logiciel de contourage automatique permet d'améliorer la qualité des contours ?/Do you think that the use of automatic contouring software improves the quality of the contours?
- Oui/Yes
  - Non/No
- 12.1 Je pense que la segmentation automatique peut améliorer la qualité des contours/ I think that automatic segmentation can improve the quality of the contours : Pourquoi/Why ?
- Gain en reproductibilité/Gain in reproducibility
  - Gain en rapidité/Gain in speed
  - Gain en précision/Gain in accuracy
13. Pensez-vous que l'utilisation de logiciel de contourage automatique est un danger pour le métier d'oncologues-radiothérapeutes ?/ Do you think that the use of automatic contouring software is a danger for the profession of radiation oncologists?
- Oui/Yes
  - Non/No
14. Pensez-vous que l'utilisation de logiciel de contourage automatique est un danger pour la formation des jeunes oncologues-radiothérapeutes ?/Do you think that the use of automatic contouring software is a danger for the training of young radiation oncologists?
- Oui/Yes
  - Non/No
15. Selon vous, comment les outils de délinéation automatiques risquent d'impacter la formation des jeunes radiothérapeutes ?/How do you think automatic delineation tools will impact the training of young radiotherapists?
- Réponse libre/Free answer
16. Avez-vous bénéficié d'une formation sur l'intelligence artificielle au cours de votre internat ?/ Did you receive any training on artificial intelligence during your residency?
- Oui/Yes
  - Non/No
17. De quelle(s) façon(s) pensez-vous qu'il faudrait adapter la formation des radiothérapeutes ?/ In what way(s) do you think the training of radiation oncologists should be adapted?
- Passer moins de temps à apprendre à contourer les volumes contourés par le logiciel/Spend less time learning to contour the volumes contoured by the software



- Interdire les logiciels de délinéation automatique en début de cursus/ Prohibit automatic delineation software at the beginning of the residency
  - Intégrer les outils d'IA dans la formation/Integrating AI tools into the training
  - Faciliter les formations personnelles sur l'IA (DU/DIU/M2)/ Facilitate personal training on AI (University degree,...)
  - Aucune adaptation/No changes
  - Autre/Other :
18. Pensez-vous que les outils de délinéation automatique présentent un risque d'erreur supplémentaire dans le work-flow ?/ Do you think that automatic delineation tools present an additional risk of error in the workflow?
- Oui/Yes
  - Non/No
19. [Echelle d'opportunité] Selon vous, l'intégration de l'intelligence artificielle en radiothérapie présente...
- [Opportunity scale] In your opinion, the integration of artificial intelligence in radiotherapy presents..
- 1 (Aucune opportunité/No opportunity) -> (Très forte opportunité/Very high opportunity)
20. [Echelle de menace] Selon vous, l'intégration de l'intelligence artificielle en radiothérapie présente...
- [Menace scale] In your opinion, the integration of artificial intelligence in radiotherapy presents..
- 1 (Aucune menace/No menace) -> (Très forte menace /Very high menace)
21. [Echelle de confiance] Selon vous, l'intégration de l'intelligence artificielle en radiothérapie présente...
- [Trust scale] In your opinion, the integration of artificial intelligence in radiotherapy presents..
- 1 (Aucune confiance/No trust) -> (Très forte confiance /Very high trust)
22. En quelques mots, comment pensez-vous que la spécialité de radiothérapie évoluera vis-à-vis de ces outils d'intelligence artificielle ?/ In a few words, how do you think the radiotherapy specialty will evolve with respect to these artificial intelligence tools ?
- Réponse libre/Free answer

**Supplementary Table S1.** Checklist for Reporting Results of Internet E-Surveys (CHERRIES).

|                                                                                      |                                                                                                           |                                                                                                                                                            |
|--------------------------------------------------------------------------------------|-----------------------------------------------------------------------------------------------------------|------------------------------------------------------------------------------------------------------------------------------------------------------------|
| Design                                                                               | Describe survey design                                                                                    | Done                                                                                                                                                       |
| Institutional Review Board (IRB) approval and Informed consent process               | IRB approval                                                                                              | Not required                                                                                                                                               |
|                                                                                      | Informed consent                                                                                          | Information was provided on the first page of the survey                                                                                                   |
|                                                                                      | Data protection                                                                                           | No personal information was stored                                                                                                                         |
| Development and pre-testing                                                          | Development and testing                                                                                   | Methodology for the development of the survey is detailed in the manuscript.                                                                               |
| Recruitment process and description of the sample having access to the questionnaire | Open survey versus closed survey                                                                          | Closed survey                                                                                                                                              |
|                                                                                      | Contact mode                                                                                              | E-mail                                                                                                                                                     |
|                                                                                      | Advertising the survey                                                                                    | E-mail: mandatory for the registration to a webinar that was advertised using e-mails and other communication platforms (Twitter, Facebook, web page,....) |
| Survey administration                                                                | Web/E-mail                                                                                                | Web                                                                                                                                                        |
|                                                                                      | Context                                                                                                   | Mandatory for registration to a webinar that was advertised using e-mails and other communication platforms (Twitter, Facebook, web page,....)             |
|                                                                                      | Mandatory/voluntary                                                                                       | Mandatory                                                                                                                                                  |
|                                                                                      | Incentives                                                                                                | Mandatory for registration to a webinar                                                                                                                    |
|                                                                                      | Time/Date                                                                                                 | Registrations to the webinar (and thus access to the survey) were opened two months before the webinar took place                                          |
|                                                                                      | Randomization of items or questionnaires                                                                  | Not feasible                                                                                                                                               |
|                                                                                      | Adaptive questioning                                                                                      | Yes                                                                                                                                                        |
|                                                                                      | Number of Items                                                                                           | 20 with sub-items                                                                                                                                          |
|                                                                                      | Number of screens (pages)                                                                                 | 4-5, depending on the answers                                                                                                                              |
|                                                                                      | Completeness check                                                                                        | All items had a mandatory answer                                                                                                                           |
|                                                                                      | Review step                                                                                               | Respondents were able to review their answers                                                                                                              |
| Response rates                                                                       | Unique site visitor                                                                                       | No participation rates are provided                                                                                                                        |
|                                                                                      | View rate (Ratio of unique survey visitors/unique site visitors)                                          |                                                                                                                                                            |
|                                                                                      | Participation rate (Ratio of unique visitors who agreed to participate/unique first survey page visitors) |                                                                                                                                                            |
|                                                                                      | Completion rate (Ratio of users who finished the survey/users who agreed to participate)                  |                                                                                                                                                            |
| Preventing multiple entries from the same individual                                 | Cookies used                                                                                              | No                                                                                                                                                         |
|                                                                                      | IP check                                                                                                  | No                                                                                                                                                         |
|                                                                                      | Log file analysis                                                                                         | No                                                                                                                                                         |
|                                                                                      | Registration                                                                                              | Yes                                                                                                                                                        |
| Analysis                                                                             | Handling of incomplete questionnaires                                                                     | Not used                                                                                                                                                   |
|                                                                                      | Questionnaires submitted with an atypical timestamp                                                       | Not applicable                                                                                                                                             |
|                                                                                      | Statistical correction                                                                                    | Not used                                                                                                                                                   |

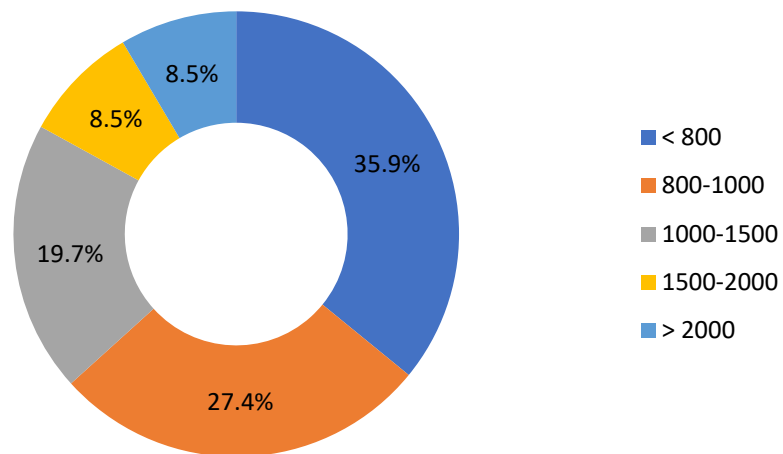

**Supplementary Figure S1.** Number of new patients per year on a participant-by-participant analysis.

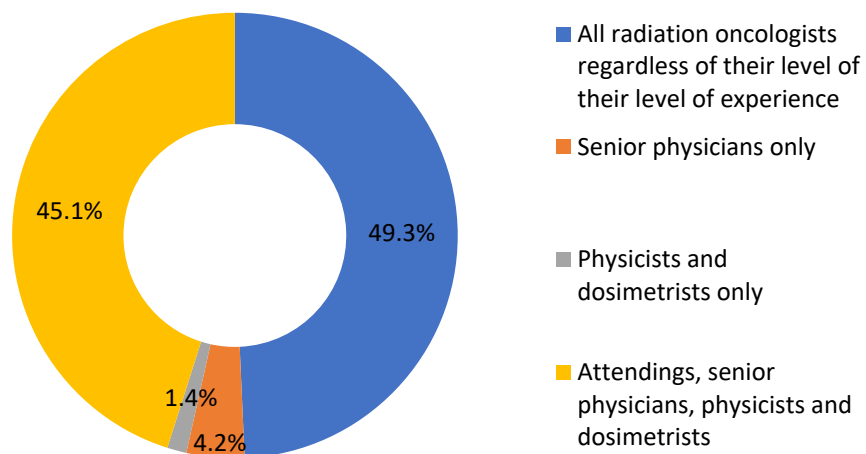

**Supplementary Figure S2.** Access to automatic segmentation solutions on a participant-by-participant analysis.

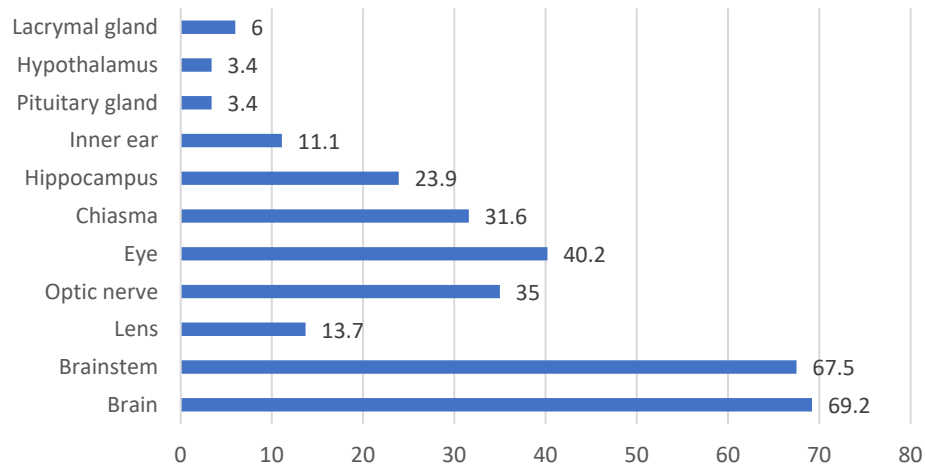

**Supplementary Figure S3.** Ranking of OARs based on their importance – Brain localization.

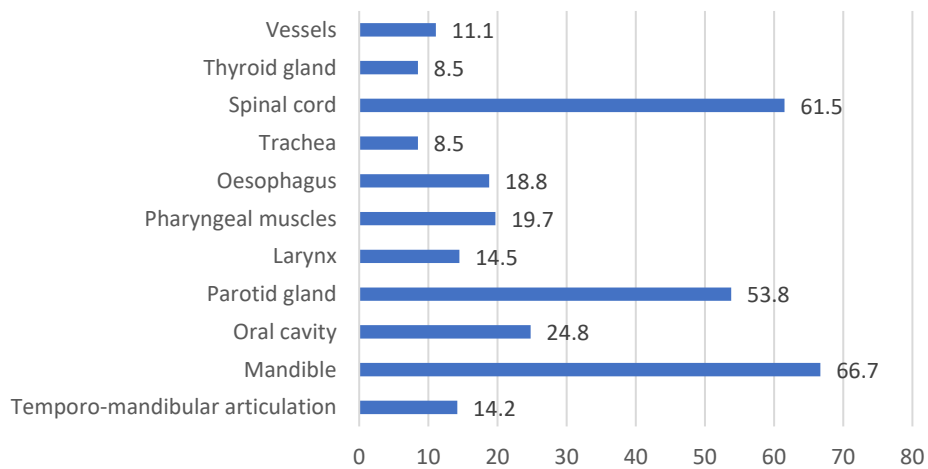

**Supplementary Figure S4.** Ranking of OARs based on their importance – Head and neck localization.

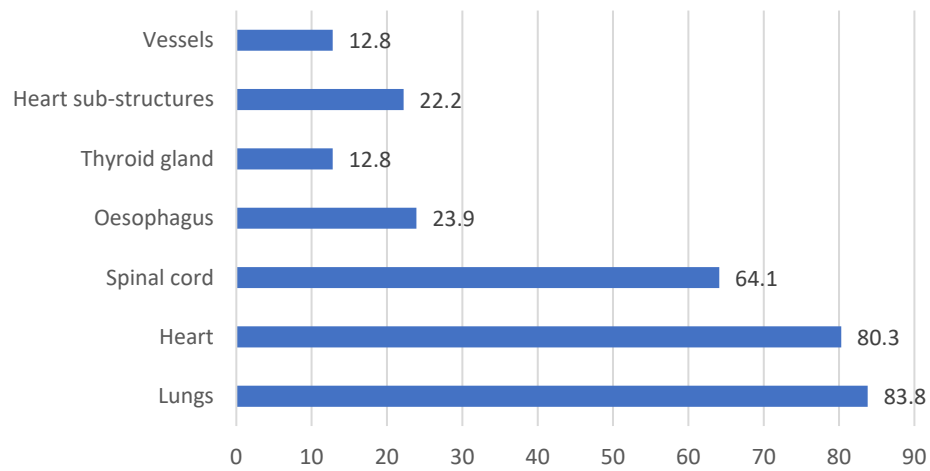

**Supplementary Figure S5.** Ranking of OARs based on their importance – Thorax localization.

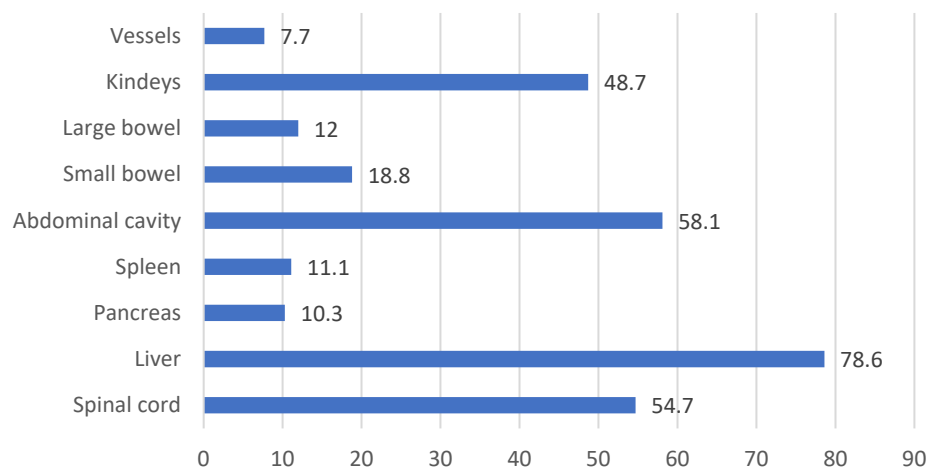

**Supplementary Figure S6.** Ranking of OARs based on their importance – Abdomen localization.

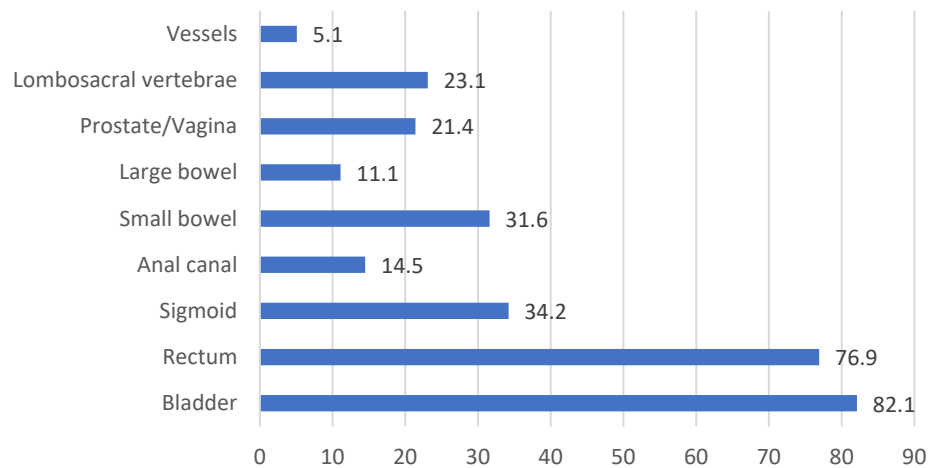

**Supplementary Figure S7.** Ranking of OARs based on their importance – Pelvis localization.

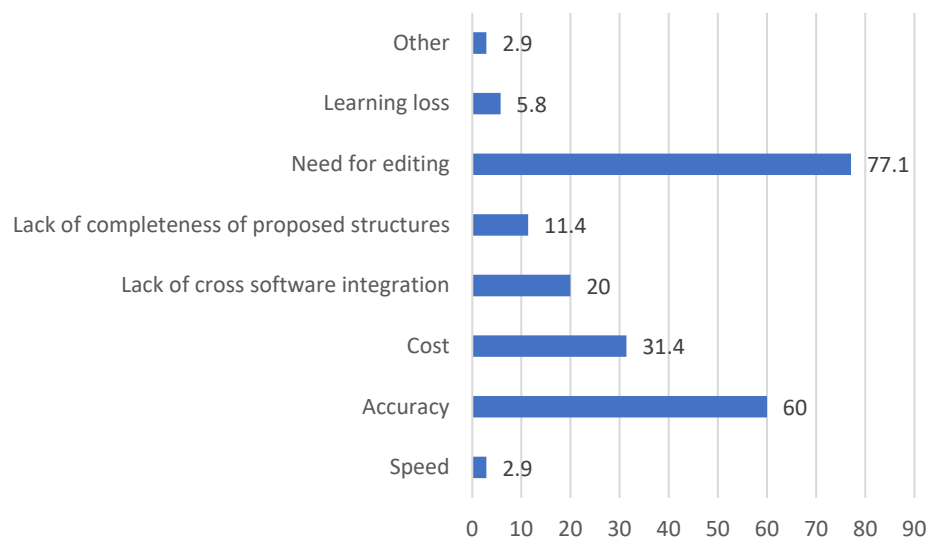

**Supplementary Figure S8.** Limitations of automatic segmentation software regarding target volumes segmentation.
